# Supplementary material for: Prevalence of pregnancy, unintended pregnancy, poor pregnancy outcome and its associated factors among female sex workers in Cameroon
Source: Research Square preprint supplement (doi:10.21203/rs.3.rs-5779160/v1), 2025-04-03
Supplement: Supplementary file 1 [file 5cd5eb11bfdfe517f85df4e3.docx]

**Checking biais for logistic regression**

1. **Influential cases**

all cases have DFBetas less than 1, and leverage statistics (LEV_1) are very close to the calculated expected value of 0.012. There are also no unusually high values of Cook’s distance (COO_1) which, all in all, means that there are no influential cases (table 5).

Table 5.

|  | N | Minimum | Maximum | Mean | Standard error |
| --- | --- | --- | --- | --- | --- |
| Résidu normalisé | 481 | -1.32036 | 4.44756 | -0.0028852 | 0.99347955 |
| Cook’s distance | 481 | 0.00012 | 0.23044 | 0.0146300 | 0.02682617 |
| Leverage (hat) values | 481 | 0.00447 | 0.07308 | 0.0145530 | 0.01099332 |
| DFBETA pour constante | 481 | -0.03547 | 0.11612 | -0.0000095 | 0.01962562 |
| DFBETA pour tranche dâge(1) | 481 | -0.15867 | 0.19245 | 0.0000285 | 0.02322521 |
| DFBETA pour tranche dâge(2) | 481 | -0.05433 | 0.02503 | 0.0000025 | 0.01257386 |
| DFBETA pour Membre d'une association de Travailleuses de sexe(1) | 481 | -0.04523 | 0.02874 | 0.0000113 | 0.01178986 |
| DFBETA pour Désir de grossesse au cours des 12 derniers mois (1) | 481 | -0.05387 | 0.02122 | 0.0000022 | 0.01243790 |
| DFBETA pour Méthode contraceptive au cours des 12 derniers mois(1) | 481 | -0.06636 | 0.02523 | -0.0000001 | 0.01323700 |
| DFBETA pour Abus d'au moins une SPA(1) | 481 | -0.06011 | 0.07754 | -0.0000017 | 0.01555006 |

1. **Outliers**

concerning standardized residual, more than 5% of cases (6.7%) have absolute values above 2 (out of ±1.96) and 12 cases have value greater than 3. These cases could be outliers.

**Table 6. standardized residual**

|  | N | Minimum | Maximum | Mean | Standard error |
| --- | --- | --- | --- | --- | --- |
| Résidu normalisé | 481 | -1.32036 | 4.44756 | -0.0028852 | 0.99347955 |

1. **Testing for multicollinearity**

To recap, tolerance values less than 0.1 and VIF values greater than 10 indicate a problem [1,2]. Table 7 shows that there is no problem.

**Table 7. Collinearity statistics**

| Model | | Collinearity statistics | |
| --- | --- | --- | --- |
| Tolerance | VIF |
| 1 | (Constante) |  |  |
| Affiliation with a sex workers' association | 0.971 | 1.030 |
| The intention to become pregnant in the previous 12 months | 0.967 | 1.035 |
| Use of at least one modern contraceptive method over the last 12 months | 0.949 | 1.054 |
| Age | 0.978 | 1.023 |
| The abuse of at least one psychoactive substance over the past 12 months | 0.991 | 1.009 |

Basically, **Affiliation with a sex workers' association** (68% of the variance of the b-value is associated with eigenvalue number 4), **The intention to become pregnant in the previous 12 months** (74% of the variance of the b-value is associated with eigenvalue number 3), **Use of at least one modern contraceptive method over the last 12 months** (70% of the variance of the b-value is associated with eigenvalue number 5), **Age** (91% of the variance of the b-value is associated with eigenvalue number 6) and **The abuse of at least one psychoactive substance over the past 12 months** (92% of the variance of the b-value is associated with eigenvalue number 2) have the bulk of their variance associated with different eigenvalues, suggesting that they are not collinear (table 8).

**Table 8. Collinearity diagnostics for the occurring of pregnancy last twelve months**

| **Collinearity Diagnosticsa** | | | | | | | | | |
| --- | --- | --- | --- | --- | --- | --- | --- | --- | --- |
| Model | Dimension | Eigenvalue | Condition Index | **Variance Proportions** | | | | | |
| (Constant) | Affiliation with a sex workers' association | The intention to become pregnant in the previous 12 months | Use of at least one modern contraceptive method over the last 12 months | Age | The abuse of at least one psychoactive substance over the past 12 months |
| 1 | 1 | 3.748 | 1.000 | 0.00 | 0.02 | 0.02 | 0.02 | 0.00 | 0.01 |
| 2 | .849 | 2.101 | 0.00 | 0.04 | 0.00 | 0.00 | 0.00 | 0.92 |
| 3 | .674 | 2.359 | 0.00 | 0.00 | 0.74 | 0.11 | 0.00 | 0.00 |
| 4 | .491 | 2.763 | 0.00 | 0.68 | 0.10 | 0.16 | 0.00 | 0.05 |
| 5 | .205 | 4.275 | 0.06 | 0.25 | 0.13 | 0.70 | 0.09 | 0.02 |
| 6 | .033 | 10.580 | 0.94 | 0.00 | 0.01 | 0.01 | 0.91 | 0.00 |
| a. Dependent Variable: pregnancy occurrence among FSWs last twelve months | | | | | | | | | |
