# Supplementary material for: Prevalence of pregnancy, unintended pregnancy, poor pregnancy outcome and its associated factors among female sex workers in Cameroon
Source: Research Square preprint supplement (doi:10.21203/rs.3.rs-5779160/v1), 2025-04-03
Supplement: Supplementary file 1 [file e644e11e5de23b49833ff9fc.pdf]

# COMITE NATIONAL D'ETHIQUE DE LA RECHERCHE POUR LA SANTÉ HUMAINE

- N° d'enregistrement : IORG0007861-IRB00009439-FWA00016054

- Arrêté N° 0977/A/MSP/SESP/SG/DROS du 18 avril 2012 portant création, organisation et fonctionnement des Comités d'Ethique de la Recherche pour la Santé Humaine au sein des structures relevant du ministère en charge de la santé publique.

N° 2023/02/1945/L/CNERSH/SP

Yaoundé, le 24 MARS 2023

[setcominae@gmail.com](mailto:setcominae@gmail.com)

## LETRE D'INFORMATION

Le Comité National d'Ethique de la Recherche pour la Santé Humaine (CNERSH), en sa session ordinaire du 23 février 2023 a réexaminé le projet de recherche intitulé: «**Evaluation study of the pilot implementation of pre-exposure prophylaxis among key populations in Cameroon**» soumis par **Monsieur ANOUBISSI Jean de Dieu**, Investigateur Principal, Comité National de Lutte contre le SIDA, Cameroun.

Suite à la réponse du chercheur à la lettre d'observation n° 2022/10/1908/L/CNERSH/SP du 14 octobre 2022, le Comité a conclu que sous la forme actuelle, étant donné qu'il s'agit d'activité interne du programme, le présent protocole ne nécessite pas l'octroi d'une clairance éthique le comité a reformulé les observations suivantes:

| N° | Commentaire de la lettre                                                                                           | Réponse du Chercheur                                                                                                                                                                                                                                                                                                                                                                                                                                                                                                                                                                                                         | Observations du Comité                                                                                                             |
|----|--------------------------------------------------------------------------------------------------------------------|------------------------------------------------------------------------------------------------------------------------------------------------------------------------------------------------------------------------------------------------------------------------------------------------------------------------------------------------------------------------------------------------------------------------------------------------------------------------------------------------------------------------------------------------------------------------------------------------------------------------------|------------------------------------------------------------------------------------------------------------------------------------|
| 1  | Préciser la liberté de se retirer de l'étude à tout moment                                                         |                                                                                                                                                                                                                                                                                                                                                                                                                                                                                                                                                                                                                              | Observation du comité non prise en compte                                                                                          |
| 2  | Expliquer « point chaud »                                                                                          |                                                                                                                                                                                                                                                                                                                                                                                                                                                                                                                                                                                                                              | Observation du comité non prise en compte                                                                                          |
| 3  | Harmoniser le point 8 de la méthodologie (sample size et justification) et les objectifs                           |                                                                                                                                                                                                                                                                                                                                                                                                                                                                                                                                                                                                                              | Observation du comité non prise en compte                                                                                          |
| 4  | Dans certaines parties du document, remplacer Sénégalais par camerounais (cf page 9)                               |                                                                                                                                                                                                                                                                                                                                                                                                                                                                                                                                                                                                                              | Observation du comité non prise en compte                                                                                          |
| 5  | Si l'évaluation de l'étude pilote est une activité interne au projet, pourquoi recourir à une évaluation externe ? | La mise en œuvre de la PrEP au Cameroun a vu l'implication des intervenants communautaires vue la vulnérabilité des cibles <b>CHAMP</b> initie la MEO de la PrEP en avril 2019 dans les villes de Yaoundé et de Douala. Une extension des sites a été sollicité et argumenter après 06 mois de MEO d'où l'extension à Bafoussam et à Bertoua en Août 2020. Le partenaire CAMNAFAW s'est enrôlé pour l'implémentation dans certaines FOSA public.<br>Le principal objectif de ce projet pilote est d'évaluer les composants spécifiques d'un protocole d'administration de la PrEP afin d'inclure une mise en œuvre intégrale | La réponse donnée conforte l'idée d'une évaluation interne des outils, approche et méthodologies avant la mise en œuvre du projet. |
