# Supplementary material for: Prevalence of pregnancy, unintended pregnancy, poor pregnancy outcome and its associated factors among female sex workers in Cameroon
Source: Research Square preprint supplement (doi:10.21203/rs.3.rs-5779160/v1), 2025-04-03
Supplement: Supplementary file 2 [file a2333fbf354c10c49bf1749b.docx]

***QUESTIONNAIRE OVERVIEW OF PREGNANCY AND PREGNANCY INTENTION***

**GENERAL QUESTIONS**

|  | Investigator's name or code |  |
| --- | --- | --- |
| **Q01** | Town | 1*. Yaoundé 2. Douala 3. Bafoussam 4. Bertoua 5. Kribi* |
| **Q02** | Date of collection | /___//___/ /___//___/ /___//___//___//___/ |

|  | **SECTION I: PRELIMINARY QUESTIONS** | | |
| --- | --- | --- | --- |
| **Q101** | Are you HIV-negative? | *0. No*  *1. Yes*  *9. Don't know* | If 0 or 9 End questionnaire |
| **Q102** | If so, when was your last HIV test? | */___/___/ months* |  |

|  | **SECTION II: SOCIO-DEMOGRAPHIC CHARACTERISTICS** | |  |
| --- | --- | --- | --- |
| **Q201** | How old are you? (Insist on having the age in completed years and if necessary help the respondent to obtain it) | */___/___/ years* |  |
| **Q202** | What is your marital status? | *1. Married*  *2. Cohabiting*  *3. Single*  *4. Divorced*  *5. Widowed*  *9. No answer* |  |
| **Q203** | Cohabitation with a sexual partner? | *0. No*  *1. Yes* |  |
| **Q204** | What is your highest level of education? | *1. Not at school*  *2. Primary*  *3. Secondary*  *4. Higher education* |  |
| **Q205** | having source of income other than prostitution? | *0. No*  *1. Yes* |  |
| **Q206** | What is your religion ? | *1. No religion*  *2. Traditional*  *3. Christian*  *4. Islamism*  *5. Esoteric orders (Rose Croix...)*  *6. Other to specify* |  |
| **Q207** | affiliation with a sex workers' association? | *0. No*  *1. Yes* | If 0 go to Q309 |
| **Q208** | If so, specify the name of the network or association | __________________ |  |
| **Q209** | Do anyone close to you know of your FSW status? | *0. No*  *1. Yes* | f 0 go to Q401 |
| **Q210** | If yes to the previous question, specify the type of people close to you who know your FSW status | 1. Father  2. Mother  3. Brothers and/or sisters  4. Wives or partners  5. Friends  6. Others to be specified | /___/___/   /___/___/   /___/___/ |

| **SECTION III: HIV-RELATED CHARACTERISTICS AND RISKS, PREVIOUS PREGNANCY, INTENTION TO BECOME PREGNANT AND USE OF CONTRACEPTIVES** | | | | | |
| --- | --- | --- | --- | --- | --- |
| **Q301** | HIV test in the last 12 months | *0. No*  *1. Yes* | | | /___/ |
| **Q302a** | Genital pain in the last 12 months | *0. No*  *1. Yes* | | | /___/ |
| **Q302b** | Urethral discharge in the last 12 months | *0. No*  *1. Yes* | | | /___/ |
| **Q302c** | Burning on urination in the last 12 months | *0. No*  *1. Yes* | | | /___/ |
| **Q302d** | Frequent urination in the past 12 months | *0. No*  *1. Yes* | | | /___/ |
| **Q302e** | Itchy sex in the last 12 months | *0. No*  *1. Yes* | | | /___/ |
| **Q302f** | Ulcerations/sores on sex in the past 12 months | *0. No*  *1. Yes* | | | /___/ |
| **Q302g** | Inguinal swelling in the last 12 months | *0. No*  *1. Yes* | | | /___/ |
| **Q302h** | Pimples with clear content on genital area in the last 12 months | *0. No*  *1. Yes* | | | /___/ |
| **Q3024i** | Venereal vegetation (cockscomb) in the last 12 months | *0. No*  *1. Yes* | | | /___/ |
| **Q302j** | Enough white discharge in the last 12 months | *0. No*  *1. Yes* | | | /___/ |
| **Q303** | Over the past twelve months, have you made any plans or expressed any desire to have children? | *0. No*  *1. Yes* | | | /___/ |
| **Q304** | Pregnancy in the last 12 months | *0. No*  *1. Yes* | | | /___/ |
| **Q305** | If yes, have you given birth? | *0. No*  *1. Yes* | | | /___/ |
| **Q306** | If no, did you have an abortion? | *0. No*  *1. Yes* | | | /___/ |
| **Q307** | Contraceptive method in the last 12 months | *0. No*  *1. Yes* | | | /___/ |
| **Q308** | If you have used a modern contraceptive method in the last 12 months, which one? | 1. Injectables  2. Pills  3. Implant  4. Condoms  5. IUD | | | /___/ |
| **Q309** | Level of your risk of contracting HIV according to your past and current sexual practices | *1. Not at all high*  *2. Not high*  *3. Neutral*  *4. High*  *5. Very high* | | | /___/ |
| **Q310** | Approximately how many men have you had sex with in the last six months? |  | | | /___/___/ |
| **Q311** | Sexual relations with regular male partners in the last six months? | *0. No*  *1. Yes* | | | /___/ |
| **Q312** | If yes, number of regular partners |  | | | /___/___/ |
| **Q313** | Systematic use of condoms during the most recent episode of sex in the last six months | *0. No*  *1. Yes* | | | /___/ |
| **Q314** | Use of a condom the last time you had sex | *0. No*  *1. Yes* | | | /___/ |
| **Q315** | Sexual intercourse while intoxicated with psychoactive substances or alcohol? | *0. No*  *1. Yes* | | | /___/ |
| **Section IV: Use of psychoactive substances in the past 12 months** | | Never | Less than once a week | Once or twice a week | More than twice a week |
| **Q401** | How often do you drink alcohol? | 1 | 2 | 3 | 4 |
| **Q402** | How often do you use marijuana? | 1 | 2 | 3 | 4 |
| **Q403** | How often do you use inhalants (Soukoudaï, glues, etc.)? | 1 | 2 | 3 | 4 |
| **Q404** | How often do you use cocaine? | 1 | 2 | 3 | 4 |
| **Q405** | How often do you use amphetamines? | 1 | 2 | 3 | 4 |
| **Q406** | How often do you use Crack? | 1 |  |  |  |
| **Q407** | How often do you take barbiturates? |  | 2 | 3 | 4 |
| **Q408** | How often do you use hallucinogens? | 1 |  |  |  |
| **Q409** | How often do you take Tramadol? |  | 2 | 3 | 4 |
| **Q410** | How often do you use Ecstasy? | 1 |  |  |  |
| **Q411** | How often do you use heroin? |  | 2 | 3 | 4 |
| **Q412** | How often do you inject drugs? | 1 | 2 | 3 | 4 |
| **Q413** | How often do you smoke cigarettes or tobacco? | 1 | 2 | 3 | 4 |
